# Supplementary material
Source: Springer Nature journal article supplement (https://www.springermedizin.de/resource/supplementary/12913_2012_2667_MOESM1_ESM.pdf/9531180)
Supplement: MOESM1 [file 9531180]

institutional contexts  
of hospital governance

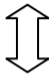

hospital/operational governance of costs and quality

org.-managerial control

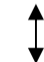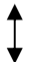

prof. self-governing control

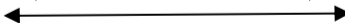

hybridisation
